# Supplementary material
Source: PubMed Central journal article supplement (PMC6072572)
Supplement: NIHMS971937-supplement-1.pdf [file NIHMS971937-supplement-1.pdf]

**Supplementary Table 1.** Cell line IC<sub>50</sub> for 6TG +/- 10  $\mu$ M MTA

| Cell line   | Cell type/origin      | MTAP status | IC <sub>50</sub> 6TG ( $\mu$ M) | IC <sub>50</sub> 6TG+MTA ( $\mu$ M) | Ratio 6TG+MTA/6TG |
|-------------|-----------------------|-------------|---------------------------------|-------------------------------------|-------------------|
| ACHN        | Kidney Tumor          | Negative    | 2.83                            | 10.31                               | 3.6               |
| HT1080      | Fibrosarcoma          | Negative    | 0.07                            | 1.70                                | 1.7               |
| Nf2-54      | Mesothelioma          | Negative    | 0.12                            | 0.16                                | 1.3               |
| Nf2-15      | Mesothelioma          | Negative    | 0.22                            | 0.38                                | 1.8               |
| 769-p       | Kidney Tumor          | Positive    | 2.57                            | 17.87                               | 7.0               |
| Caki        | Kidney Tumor          | Positive    | 0.07                            | 36.40                               | 554               |
| HEK293      | Embryonic Kidney      | Positive    | 1.94                            | 5.24                                | 2.7               |
| HL60        | Promyeloblast         | Positive    | 0.60                            | 128.3                               | 214               |
| MEF5        | Embryonic Fibroblast  | Positive    | 44.9                            | 4137                                | 96.2              |
| MEF8        | Embryonic Fibroblast  | Positive    | 58                              | 594                                 | 10.3              |
| MCF-7+MTAP  | Breast Adenocarcinoma | Positive    | 13.4                            | 43.6                                | 3.25              |
| Nf2-28      | Mesothelioma          | Positive    | 0.33                            | 167.1                               | 509               |
| Nf2-45      | Mesothelioma          | Positive    | 0.18                            | 248.9                               | 1420              |
| Nf2-53      | Mesothelioma          | Positive    | 0.14                            | 192.8                               | 1368              |
| Nf2-78      | Mesothelioma          | Positive    | 16.4                            | 566                                 | 34.5              |
| Nf2#82      | Mesothelioma          | Positive    | 0.56                            | 57.5                                | 102               |
| HT1080+MTAP | Fibrosarcoma          | Positive    | 0.06                            | 15.9                                | 360               |

**Supplementary Table 2.** Cell line IC50 for 2FA +/- 10  $\mu$ M MTA

| Cell line                        | Cell type/origin           | MTAP status | IC <sub>50</sub> 2FA ( $\mu$ M) | IC <sub>50</sub> 2FA+MTA ( $\mu$ M) | Ratio 2FA+MTA/6TG |
|----------------------------------|----------------------------|-------------|---------------------------------|-------------------------------------|-------------------|
| 3T3- <i>MTAP</i> <sup>-</sup>    | Mouse Embryonic Fibroblast | Negative    | 0.17                            | 0.21                                | 1.3               |
| A172                             | Glioblastoma               | Negative    | 0.11                            | 0.11                                | 1.0               |
| U87                              | Glioblastoma               | Negative    | 0.40                            | 0.65                                | 1.6               |
| HT1080- <i>MTAP</i> <sup>-</sup> | Fibrosarcoma               | Negative    | 0.08                            | 0.09                                | 1.2               |
| JC101                            | Pancreatic Cancer          | Negative    | 8.0                             | 7.5                                 | 0.9               |
| A549                             | Lung Cancer                | Negative    | 0.9                             | 1.2                                 | 1.3               |
| MiaPaca2                         | Pancreatic Cancer          | Negative    | 2.3                             | 2.2                                 | 1.0               |
| 3T3- <i>MTAP</i> <sup>+</sup>    | Mouse Embryonic Fibroblast | Positive    | 0.09                            | 6.0                                 | 70                |
| HT1080- <i>MTAP</i> <sup>+</sup> | Embryonic Fibroblast       | Positive    | 0.03                            | 0.6                                 | 22                |
| MCF-7+ <i>MTAP</i> <sup>+</sup>  | Breast Adenocarcinoma      | Positive    | 0.33                            | 3.8                                 | 11.4              |
| GM13605                          | EBV lymphocyte             | Positive    | 0.26                            | 1.5                                 | 5.7               |
| GM17733                          | EBV lymphocyte             | Positive    | 0.20                            | 2.5                                 | 12.9              |
| GM17738                          | EBV lymphocyte             | Positive    | 0.54                            | 3.8                                 | 6.5               |
