# Supplementary material
Source: PubMed Central journal article supplement (PMC6072572)
Supplement: NIHMS971937-supplement-3.pdf [file NIHMS971937-supplement-3.pdf]

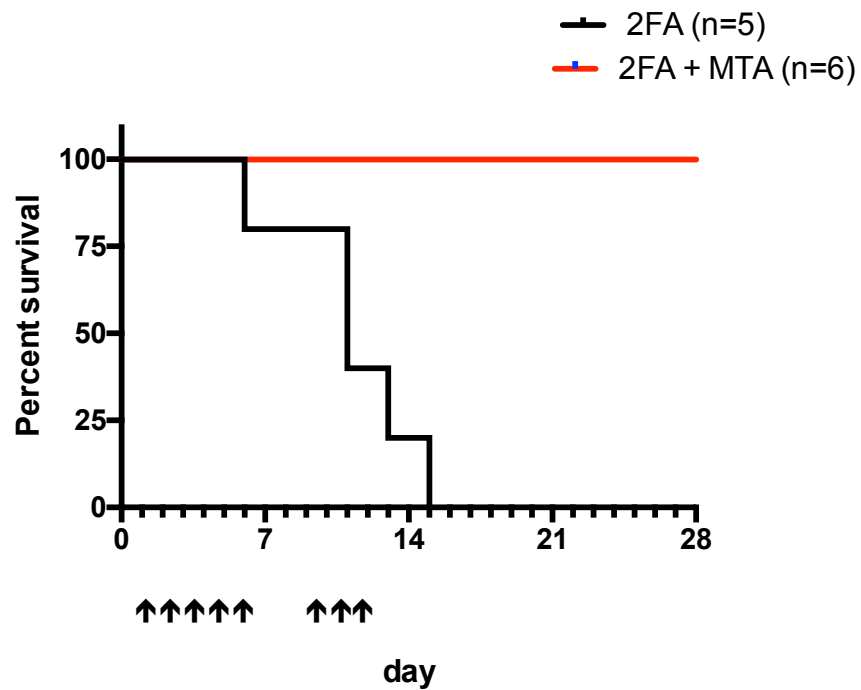

**Supplementary Figure 8.** Survival of C57BL6 mice treated with multiple doses i.p. 2FA and i.p. 2FA+MTA. C57BL6 mice were i.p. injected with either 20 mg/kg 2FA alone, or 20 mg/kg 2FA+ 100 mg/kg MTA as indicated by arrows. Mice were then monitored daily until moribund. P=0.007 (log-rank test).

A.

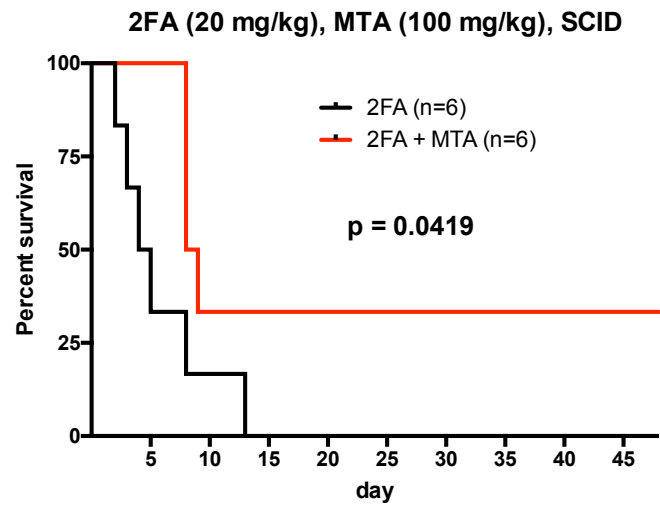

B.

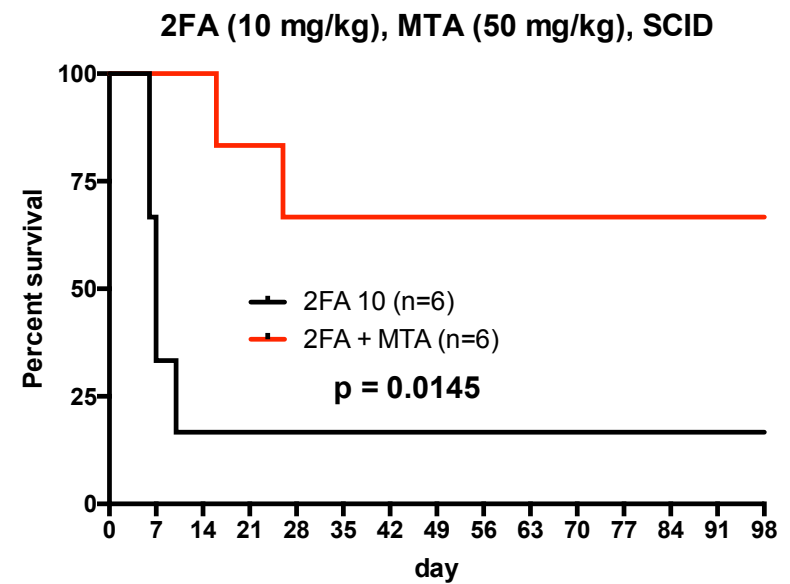

**Supplementary Figure 9.** Survival of SCID mice treated with multiple doses i.p. 2FA and i.p. 2FA+MTA. A. SCID mice were i.p injected with 20 mg/ kg 2FA or 20 mg/kg 2FA+ 100 mg/kg MTA once a day for five days and survival was monitored. B. Same as A, but using half the dosage.
